# Supplementary material for: Genetic architecture of male courtship behavior differences in the parasitoid wasp genus Nasonia (Hymenoptera; Pteromalidae)
Source: bioRxiv or medRxiv preprint supplement (doi:10.1101/831735), 2019-11-07
Supplement: Supplementary file [file media-1.pdf]

**SOM Table 1:** Phenotypic Correlations (Spearman's rank correlation coefficient) between all courtship components of our QTL analysis. All cycle and headnod phenotypes are highly correlated.

|                |                         |                         | latency | fix-nod | cycle1 | cycle2 | cycle3 | cycle4 | hns1   | hns2   | hns3   | hns4    | h2_h1   | totalseries |
|----------------|-------------------------|-------------------------|---------|---------|--------|--------|--------|--------|--------|--------|--------|---------|---------|-------------|
| Spearman's rho | latency                 | Correlation Coefficient | 1,000   | ,227**  | ,217** | ,283** | ,295** | ,279** | -,028  | -,009  | ,056   | ,087    | ,031    | -,033       |
|                |                         | Sig. (2-tailed)         |         | ,000    | ,000   | ,000   | ,000   | ,000   | ,653   | ,882   | ,365   | ,168    | ,621    | ,640        |
|                |                         | N                       | 268     | 236     | 255    | 257    | 210    | 199    | 266    | 267    | 266    | 254     | 265     | 202         |
|                | fix-nod                 | Correlation Coefficient |         | 1,000   | ,528** | ,525** | ,492** | ,462** | ,081   | ,086   | ,082   | ,083    | ,019    | -,117       |
|                |                         | Sig. (2-tailed)         |         |         | ,000   | ,000   | ,000   | ,000   | ,185   | ,158   | ,179   | ,184    | ,752    | ,115        |
|                |                         | N                       |         | 270     | 257    | 258    | 193    | 182    | 269    | 269    | 269    | 255     | 268     | 184         |
|                | cycle1                  | Correlation Coefficient |         |         | 1,000  | ,830** | ,778** | ,702** | ,315** | ,305** | ,299** | ,246**  | -,008   | -,133       |
|                |                         | Sig. (2-tailed)         |         |         |        | ,000   | ,000   | ,000   | ,000   | ,000   | ,000   | ,000    | ,891    | ,066        |
|                |                         | N                       |         |         | 294    | 281    | 199    | 191    | 292    | 293    | 291    | 277     | 291     | 192         |
|                | cycle2                  | Correlation Coefficient |         |         |        | 1,000  | ,833** | ,812** | ,293** | ,358** | ,372** | ,302**  | ,092    | -,244**     |
|                |                         | Sig. (2-tailed)         |         |         |        |        | ,000   | ,000   | ,000   | ,000   | ,000   | ,000    | ,116    | ,001        |
|                |                         | N                       |         |         |        | 292    | 206    | 194    | 290    | 292    | 291    | 278     | 290     | 198         |
|                | cycle3                  | Correlation Coefficient |         |         |        |        | 1,000  | ,889** | ,221** | ,284** | ,381** | ,307**  | ,040    | -,203**     |
|                |                         | Sig. (2-tailed)         |         |         |        |        |        | ,000   | ,001   | ,000   | ,000   | ,000    | ,566    | ,004        |
|                |                         | N                       |         |         |        |        | 210    | 195    | 210    | 209    | 210    | 201     | 209     | 195         |
| cycle4         | Correlation Coefficient |                         |         |         |        |        | 1,000  | ,232** | ,269** | ,368** | ,341** | ,019    | -,213** |             |
|                | Sig. (2-tailed)         |                         |         |         |        |        |        | ,001   | ,000   | ,000   | ,000   | ,787    | ,003    |             |
|                | N                       |                         |         |         |        |        | 199    | 199    | 198    | 199    | 199    | 198     | 186     |             |
| Headnod 1      | Correlation Coefficient |                         |         |         |        |        |        | 1,000  | ,720** | ,605** | ,592** | -,327** | -,113   |             |
|                | Sig. (2-tailed)         |                         |         |         |        |        |        |        | ,000   | ,000   | ,000   | ,000    | ,111    |             |
|                | N                       |                         |         |         |        |        |        | 306    | 305    | 303    | 289    | 305     | 202     |             |
| Headnod 2      | Correlation Coefficient |                         |         |         |        |        |        |        | 1,000  | ,754** | ,729** | ,357**  | -,050   |             |
|                | Sig. (2-tailed)         |                         |         |         |        |        |        |        |        | ,000   | ,000   | ,000    | ,480    |             |
|                | N                       |                         |         |         |        |        |        |        | 307    | 304    | 290    | 305     | 201     |             |
| Headnod 3      | Correlation Coefficient |                         |         |         |        |        |        |        |        | 1,000  | ,826** | ,208**  | -,101   |             |
|                | Sig. (2-tailed)         |                         |         |         |        |        |        |        |        |        | ,000   | ,000    | ,154    |             |
|                | N                       |                         |         |         |        |        |        |        |        | 305    | 290    | 302     | 202     |             |
| Headnod 4      | Correlation Coefficient |                         |         |         |        |        |        |        |        |        | 1,000  | ,178**  | -,078   |             |
|                | Sig. (2-tailed)         |                         |         |         |        |        |        |        |        |        |        | ,002    | ,277    |             |
|                | N                       |                         |         |         |        |        |        |        |        |        | 291    | 288     | 194     |             |
| h2_h1          | Correlation Coefficient |                         |         |         |        |        |        |        |        |        |        | 1,000   | ,094    |             |
|                | Sig. (2-tailed)         |                         |         |         |        |        |        |        |        |        |        |         | ,185    |             |
|                | N                       |                         |         |         |        |        |        |        |        |        |        | 305     | 201     |             |

|             |                         |  |  |  |  |  |  |  |  |  |  |  |       |
|-------------|-------------------------|--|--|--|--|--|--|--|--|--|--|--|-------|
| totalseries | Correlation Coefficient |  |  |  |  |  |  |  |  |  |  |  | 1,000 |
|             | Sig. (2-tailed)         |  |  |  |  |  |  |  |  |  |  |  | .     |
|             | N                       |  |  |  |  |  |  |  |  |  |  |  | 202   |

\*\* . Correlation is significant at the 0.01 level (2-tailed).

**SOM Table 2: Summary of the explained phenotypic variance from the two way interaction analysis.** For this analysis we conducted a whole genome two-way interaction analysis in which we searched for loci that had no significant effect on the phenotypes on their own ( see Fig. 3 secondary loci for a graphic depiction of all interactions) but had a significant phenotypic effect in connection with another locus. The column expl.var.add. represents the phenotypic variance explained by primary and secondary loci whose effect is additive. The column expl. var. epi is the phenotypic variance in our F2 hybrid mapping population that can be explained by non-additive (= epistatic) interactions between either primary or secondary QTL loci (Figure 3). The last column is the sum of the two previous columns and represents the phenotypic variance in our mapping population that can be explained by additive and epistatic interacting QTL.

| trait           | expl. var. add. | expl. var. epi. | expl. var. total |
|-----------------|-----------------|-----------------|------------------|
| latency         | 4.97            | 0               | 4.97             |
| fix-nod         | 32.06           | 2.20            | 34.26            |
| cycle1          | 39.61           | 8.71            | 48.31            |
| cycle2          | 33.86           | 2.65            | 36.51            |
| cycle3          | 27.56           | 1.44            | 29.00            |
| cycle4          | 18.94           | 0.00            | 18.94            |
| hnd1            | 21.63           | 0.00            | 21.63            |
| hnd2            | 29.43           | 0.00            | 29.43            |
| hnd3            | 29.95           | 0.00            | 29.95            |
| hnd4            | 23.63           | 0.00            | 23.63            |
| h2_h1           | 4.77            | 0.00            | 4.77             |
| minusnods       | 12.29           | 3.16            | 15.45            |
| Forfeet rubbing | 6.93            | 1.85            | 8.78             |

**SOM Table 3:** Phenotypes of males from both parental species *N. longicornis* and *N. vitripennis*.

| species               | fix1stnod | hnd1 | hnd2 | hnd3 | hnd4 | hndtot | cyce1 | cycle2 | cycle3 | h2_h1 |
|-----------------------|-----------|------|------|------|------|--------|-------|--------|--------|-------|
| <i>N. vitripennis</i> |           | 4    |      |      | 2    |        |       |        |        |       |

|                |  |    |   |   |   |    |    |  |  |    |
|----------------|--|----|---|---|---|----|----|--|--|----|
| N. vitripennis |  | 7  | 5 | 5 | 5 | 7  | 7  |  |  | -2 |
| N. vitripennis |  | 5  | 4 | 5 | 6 | 7  |    |  |  | -1 |
| N. vitripennis |  | 6  | 5 | 7 | 8 | 5  |    |  |  | -1 |
| N. vitripennis |  | 10 | 6 | 7 | 8 | 5  | 9  |  |  | -4 |
| N. vitripennis |  | 6  |   |   |   |    |    |  |  |    |
| N. vitripennis |  | 6  | 4 |   |   |    | 8  |  |  | -2 |
| N. vitripennis |  | 8  |   |   |   |    | 10 |  |  |    |
| N. vitripennis |  | 7  | 7 |   |   |    | 10 |  |  | 0  |
| N. vitripennis |  | 5  | 5 | 3 | 5 | 6  | 10 |  |  | 0  |
| N. vitripennis |  | 6  | 3 | 4 | 5 | 7  | 8  |  |  | -3 |
| N. vitripennis |  | 4  | 3 | 4 | 5 | 7  | 9  |  |  | -1 |
| N. vitripennis |  | 6  | 4 | 5 | 5 | 7  | 6  |  |  | -2 |
| N. vitripennis |  | 4  | 3 | 4 | 4 | 9  | 8  |  |  | -1 |
| N. vitripennis |  | 4  | 3 | 4 | 5 | 10 | 7  |  |  | -1 |
| N. vitripennis |  | 3  | 4 | 4 | 4 | 8  | 6  |  |  | 1  |
| N. vitripennis |  | 4  | 3 | 4 | 5 | 7  | 7  |  |  | -1 |
| N. vitripennis |  | 4  | 4 |   |   |    | 6  |  |  | 0  |
| N. vitripennis |  | 4  | 2 | 3 | 4 | 6  | 9  |  |  | -2 |
| N. vitripennis |  | 4  | 4 | 3 | 4 | 13 | 4  |  |  | 0  |
| N. vitripennis |  | 4  | 4 | 5 | 4 | 11 | 5  |  |  | 0  |
| N. vitripennis |  | 4  | 4 | 4 | 6 | 9  | 6  |  |  | 0  |
| N. vitripennis |  | 5  |   |   |   |    | 8  |  |  |    |
| N. vitripennis |  | 4  | 4 |   |   |    | 6  |  |  | 0  |
| N. vitripennis |  | 5  | 4 |   |   |    | 8  |  |  | -1 |
| N. vitripennis |  | 4  | 6 | 4 |   |    | 7  |  |  | 2  |
| N. vitripennis |  | 4  | 2 |   |   |    | 5  |  |  | -2 |
| N. vitripennis |  | 5  | 4 |   |   |    | 7  |  |  | -1 |

|                |  |   |   |   |   |    |    |  |  |    |
|----------------|--|---|---|---|---|----|----|--|--|----|
| N. vitripennis |  | 6 | 4 |   |   |    | 8  |  |  | -2 |
| N. vitripennis |  | 7 | 6 |   |   |    | 10 |  |  | -1 |
| N. vitripennis |  | 4 | 3 | 3 | 5 | 5  | 6  |  |  | -1 |
| N. vitripennis |  | 5 | 4 |   |   |    | 10 |  |  | -1 |
| N. vitripennis |  |   |   |   |   |    |    |  |  |    |
| N. vitripennis |  | 6 | 4 |   |   |    | 11 |  |  | -2 |
| N. vitripennis |  | 6 |   |   |   |    | 11 |  |  |    |
| N. vitripennis |  | 6 | 4 |   |   |    | 11 |  |  | -2 |
| N. vitripennis |  | 4 |   |   |   |    | 7  |  |  |    |
| N. vitripennis |  | 5 |   |   |   |    | 7  |  |  |    |
| N. vitripennis |  | 6 |   |   |   |    | 7  |  |  |    |
| N. vitripennis |  | 5 | 3 |   |   |    | 7  |  |  | -2 |
| N. vitripennis |  | 5 |   |   |   |    | 7  |  |  |    |
| N. vitripennis |  | 5 | 4 | 4 | 4 | 8  | 8  |  |  | -1 |
| N. vitripennis |  | 5 | 4 | 4 | 5 | 7  | 8  |  |  | -1 |
| N. vitripennis |  | 4 | 3 | 3 |   |    | 6  |  |  | -1 |
| N. vitripennis |  | 4 | 3 | 2 | 5 | 8  | 6  |  |  | -1 |
| N. vitripennis |  | 4 | 4 | 4 | 5 | 7  | 8  |  |  | 0  |
| N. vitripennis |  | 6 | 3 | 5 | 6 | 7  | 8  |  |  | -3 |
| N. vitripennis |  | 4 | 4 | 5 | 4 | 6  | 5  |  |  | 0  |
| N. vitripennis |  | 5 | 4 | 5 | 5 | 7  | 8  |  |  | -1 |
| N. vitripennis |  | 5 | 4 |   |   |    | 5  |  |  | -1 |
| N. vitripennis |  | 4 | 4 | 4 | 4 | 6  | 8  |  |  | 0  |
| N. vitripennis |  | 3 | 3 | 4 | 4 | 10 | 8  |  |  | 0  |
| N. vitripennis |  | 5 | 4 | 5 | 4 | 8  | 7  |  |  | -1 |
| N. vitripennis |  | 4 | 4 | 4 | 4 | 6  | 7  |  |  | 0  |
| N. vitripennis |  | 4 | 4 | 4 | 4 | 8  | 7  |  |  | 0  |

|                |   |   |   |   |   |    |    |    |    |    |
|----------------|---|---|---|---|---|----|----|----|----|----|
| N. vitripennis |   | 5 | 3 | 4 | 4 | 7  | 6  |    |    | -2 |
| N. vitripennis |   | 5 | 4 | 4 | 4 | 7  | 7  |    |    | -1 |
| N. vitripennis |   | 3 | 2 | 3 | 3 | 7  | 6  |    |    | -1 |
| N. vitripennis |   | 5 | 4 | 4 | 4 | 8  | 8  |    |    | -1 |
| N. vitripennis |   | 5 | 4 | 4 | 5 | 8  | 5  |    |    | -1 |
| N. vitripennis |   | 7 | 5 | 4 | 4 | 7  | 5  |    |    | -2 |
| N. vitripennis |   | 7 | 5 | 6 | 5 | 6  | 5  |    |    | -2 |
| N. vitripennis |   | 5 | 4 | 4 | 5 | 7  |    |    |    | -1 |
| N. vitripennis |   | 6 | 4 | 4 | 5 | 14 | 11 |    |    | -2 |
| N. vitripennis |   | 8 | 4 | 4 | 5 | 6  | 8  |    |    | -4 |
| N. vitripennis |   | 5 | 3 | 5 | 5 | 6  | 9  |    |    | -2 |
| N. vitripennis |   | 3 | 4 | 4 | 5 | 8  | 6  |    |    | 1  |
| N. vitripennis |   | 4 | 4 | 4 | 4 | 7  | 9  |    |    | 0  |
| N. vitripennis |   | 7 | 4 | 7 | 8 | 7  | 7  |    |    | -3 |
| N. vitripennis |   | 5 | 4 | 5 | 5 | 7  | 8  |    |    | -1 |
| N. vitripennis |   | 6 | 5 | 5 | 6 | 8  | 8  |    |    | -1 |
| N. vitripennis |   | 5 | 5 | 6 | 5 | 7  | 8  |    |    | 0  |
| N. vitripennis |   | 5 | 3 | 5 | 5 | 6  | 9  |    |    | -2 |
| N. vitripennis |   | 4 | 3 | 3 | 3 | 9  |    |    |    | -1 |
| N. vitripennis |   |   |   |   |   |    |    |    |    |    |
| N. vitripennis |   | 4 | 2 | 2 | 4 | 7  | 5  |    |    | -2 |
| N. vitripennis |   | 3 | 2 | 3 | 3 | 5  | 4  |    |    | -1 |
| N. vitripennis |   | 4 | 4 | 3 | 2 | 11 |    |    |    | 0  |
| N. vitripennis |   | 3 | 2 | 3 | 4 | 15 | 5  |    |    | -1 |
| N. vitripennis |   |   |   |   |   |    |    |    |    |    |
| N. vitripennis | 1 | 5 | 4 | 4 | 3 |    | 6  | 6  | 7  | -1 |
| N. vitripennis | 1 | 7 | 7 | 8 | 8 |    | 8  | 10 | 10 | 0  |

|                |    |   |   |   |   |  |    |   |    |    |
|----------------|----|---|---|---|---|--|----|---|----|----|
| N. vitripennis |    | 7 | 7 |   |   |  | 11 |   |    | 0  |
| N. vitripennis | 2  | 5 | 4 | 6 |   |  | 6  | 6 |    | -1 |
| N. vitripennis | 2  | 4 |   |   |   |  | 5  |   |    |    |
| N. vitripennis | 1  | 5 | 4 | 5 | 5 |  | 5  | 5 | 6  | -1 |
| N. vitripennis | 2  | 5 |   |   |   |  | 8  |   |    |    |
| N. vitripennis | 1  | 6 | 5 | 6 | 7 |  | 8  | 8 | 8  | -1 |
| N. vitripennis | 6  | 5 | 6 | 6 | 7 |  | 7  | 8 | 8  | 1  |
| N. vitripennis | 2  | 7 | 6 | 6 | 7 |  | 7  | 7 | 8  | -1 |
| N. vitripennis | 1  | 5 | 5 |   |   |  | 8  | 8 |    | 0  |
| N. vitripennis | 1  | 5 | 5 | 7 | 7 |  | 5  | 7 | 7  | 0  |
| N. vitripennis | 2  | 6 | 6 | 7 | 6 |  | 8  | 7 | 10 | 0  |
| N. vitripennis | 2  | 7 | 6 | 5 | 6 |  | 8  | 8 | 11 | -1 |
| N. vitripennis | 1  | 5 | 6 | 7 | 4 |  | 5  | 7 | 8  | 1  |
| N. vitripennis |    | 5 | 3 | 3 | 4 |  | 4  | 4 | 6  | -2 |
| N. vitripennis | 1  | 5 | 3 |   |   |  | 5  | 6 |    | -2 |
| N. vitripennis |    |   |   |   |   |  |    |   |    |    |
| N. vitripennis | 12 | 3 | 4 | 5 | 5 |  | 6  | 7 | 7  | 1  |
| N. vitripennis | 2  | 5 | 4 | 4 | 6 |  | 6  | 6 | 8  | -1 |
| N. vitripennis | 1  | 5 | 3 | 4 | 5 |  | 5  | 5 | 5  | -2 |
| N. vitripennis | 5  | 6 | 4 | 5 | 5 |  | 6  | 5 | 7  | -2 |
| N. vitripennis | 2  | 8 | 5 | 6 | 5 |  | 8  | 7 | 9  | -3 |
| N. vitripennis |    |   |   |   |   |  |    |   |    |    |
| N. vitripennis | 1  | 3 | 4 | 5 | 7 |  |    |   | 9  | 1  |
| N. vitripennis | 1  | 5 | 4 | 4 | 3 |  | 5  | 5 | 6  | -1 |
| N. vitripennis | 2  | 7 | 5 | 5 |   |  | 7  | 7 | 7  | -2 |
| N. vitripennis | 1  | 3 | 4 | 4 | 6 |  | 4  | 5 | 6  | 1  |
| N. vitripennis | 6  | 6 | 5 | 5 | 5 |  | 7  | 7 | 8  | -1 |



|                |   |   |   |   |   |    |    |   |   |    |
|----------------|---|---|---|---|---|----|----|---|---|----|
| N. vitripennis | 1 | 4 | 3 | 5 | 5 |    | 5  | 5 | 7 | -1 |
| N. vitripennis | 1 | 5 |   |   |   |    | 6  |   |   |    |
| N. vitripennis | 1 | 5 |   |   |   |    | 7  |   |   |    |
| N. vitripennis |   | 5 | 5 | 5 | 6 |    |    |   |   |    |
| N. longicornis |   | 6 | 4 |   |   |    | 19 |   |   | -2 |
| N. longicornis |   | 2 | 3 | 2 | 3 | 10 | 12 |   |   | 1  |
| N. longicornis |   | 2 | 2 | 4 | 4 | 9  | 11 |   |   | 0  |
| N. longicornis |   | 1 | 1 | 3 | 3 | 12 | 12 |   |   | 0  |
| N. longicornis |   | 2 | 4 | 5 |   |    | 17 |   |   | 2  |
| N. longicornis |   | 2 | 3 | 4 | 4 | 11 | 13 |   |   | 1  |
| N. longicornis |   | 1 | 2 | 2 | 3 | 12 | 11 |   |   | 1  |
| N. longicornis |   | 1 | 1 | 2 | 3 | 11 | 11 |   |   | 0  |
| N. longicornis |   | 7 |   |   |   |    | 21 |   |   |    |
| N. longicornis |   | 1 | 2 | 3 | 3 | 9  | 10 |   |   | 1  |
| N. longicornis |   | 1 | 2 | 2 | 4 | 17 | 9  |   |   | 1  |
| N. longicornis |   | 1 | 2 | 2 | 2 | 20 | 11 |   |   | 1  |
| N. longicornis |   |   |   |   |   |    |    |   |   |    |
| N. longicornis |   | 2 | 2 | 2 | 3 | 9  | 13 |   |   | 0  |
| N. longicornis |   | 1 | 2 | 2 | 3 | 12 | 14 |   |   | 1  |
| N. longicornis |   | 3 |   |   |   |    | 12 |   |   |    |
| N. longicornis |   | 1 | 2 | 3 | 3 | 5  | 14 |   |   | 1  |
| N. longicornis |   | 2 | 2 | 3 | 3 | 14 | 12 |   |   | 0  |
| N. longicornis |   | 1 | 3 | 4 |   | 4  | 14 |   |   | 2  |
| N. longicornis |   | 2 | 1 |   |   |    | 11 |   |   | -1 |
| N. longicornis |   | 2 | 2 | 2 | 2 | 8  | 11 |   |   | 0  |
| N. longicornis |   | 1 | 2 |   |   |    | 13 |   |   | 1  |
| N. longicornis |   | 1 | 2 | 2 | 4 | 9  | 12 |   |   | 1  |



|                |  |   |   |   |   |    |    |  |  |   |
|----------------|--|---|---|---|---|----|----|--|--|---|
| N. longicornis |  | 2 | 2 | 2 | 2 | 6  | 14 |  |  | 0 |
| N. longicornis |  | 2 | 3 | 4 | 5 | 8  | 19 |  |  | 1 |
| N. longicornis |  | 2 | 2 | 2 | 2 | 5  | 13 |  |  | 0 |
| N. longicornis |  | 1 | 2 | 2 | 3 | 11 | 10 |  |  | 1 |
| N. longicornis |  | 1 | 2 |   |   |    | 12 |  |  | 1 |
| N. longicornis |  | 1 | 2 | 2 | 2 | 7  | 12 |  |  | 1 |
| N. longicornis |  | 1 | 1 | 2 | 2 | 8  | 12 |  |  | 0 |
| N. longicornis |  | 3 | 4 | 4 | 4 | 6  | 12 |  |  | 1 |
| N. longicornis |  | 1 | 2 | 2 | 4 | 7  | 9  |  |  | 1 |
| N. longicornis |  | 2 | 2 | 2 | 2 | 6  | 13 |  |  | 0 |
| N. longicornis |  | 2 | 2 | 2 | 3 | 9  | 15 |  |  | 0 |
| N. longicornis |  | 1 | 1 | 2 | 2 | 8  | 13 |  |  | 0 |
| N. longicornis |  | 2 | 2 | 3 | 4 | 7  | 17 |  |  | 0 |
| N. longicornis |  |   |   |   |   |    |    |  |  |   |
| N. longicornis |  | 1 | 1 | 2 | 2 | 10 | 10 |  |  | 0 |
| N. longicornis |  | 1 | 2 | 2 | 2 | 12 | 14 |  |  | 1 |
| N. longicornis |  | 1 | 2 |   |   |    | 11 |  |  | 1 |
| N. longicornis |  | 2 | 2 | 3 |   |    | 16 |  |  | 0 |
| N. longicornis |  | 1 | 2 | 3 | 3 | 6  | 11 |  |  | 1 |
| N. longicornis |  | 1 | 2 | 2 | 2 | 7  | 13 |  |  | 1 |
| N. longicornis |  | 1 | 1 |   |   |    | 10 |  |  | 0 |
| N. longicornis |  | 2 | 2 | 2 | 3 | 8  | 15 |  |  | 0 |
| N. longicornis |  | 1 | 1 |   |   |    | 13 |  |  | 0 |
| N. longicornis |  | 1 | 1 | 2 | 2 | 5  | 13 |  |  | 0 |
| N. longicornis |  | 1 | 1 | 2 |   |    | 15 |  |  | 0 |
| N. longicornis |  | 1 | 1 | 2 | 2 | 9  | 13 |  |  | 0 |
| N. longicornis |  | 1 |   |   |   |    | 22 |  |  |   |

|                |  |   |   |   |   |    |    |  |  |   |
|----------------|--|---|---|---|---|----|----|--|--|---|
| N. longicornis |  | 1 | 1 | 2 | 2 | 8  | 14 |  |  | 0 |
| N. longicornis |  | 1 | 1 | 2 | 2 | 17 | 12 |  |  | 0 |
| N. longicornis |  | 2 | 2 | 3 | 3 | 9  | 15 |  |  | 0 |
| N. longicornis |  | 1 | 1 | 3 | 2 | 8  | 12 |  |  | 0 |
| N. longicornis |  | 1 | 1 | 1 | 1 | 5  | 12 |  |  | 0 |
| N. longicornis |  | 1 | 1 | 3 | 2 | 8  | 12 |  |  | 0 |
| N. longicornis |  |   |   |   |   |    |    |  |  |   |
| N. longicornis |  |   |   |   |   |    |    |  |  |   |
| N. longicornis |  | 1 | 1 | 2 | 2 | 9  | 13 |  |  | 0 |
| N. longicornis |  | 1 | 3 | 4 | 5 | 9  |    |  |  | 2 |
| N. longicornis |  | 3 | 3 | 3 | 4 | 7  | 17 |  |  | 0 |
| N. longicornis |  | 1 | 1 | 2 | 3 | 7  | 15 |  |  | 0 |
| N. longicornis |  | 1 | 2 | 2 | 3 | 8  | 18 |  |  | 1 |
| N. longicornis |  | 3 | 3 | 6 | 7 | 6  | 14 |  |  | 0 |
| N. longicornis |  | 1 | 1 | 2 | 2 | 12 | 11 |  |  | 0 |
| N. longicornis |  | 1 | 2 | 2 | 2 | 14 | 14 |  |  | 1 |
| N. longicornis |  | 1 | 1 | 1 | 2 | 11 | 11 |  |  | 0 |
| N. longicornis |  | 1 | 1 | 2 | 2 | 14 | 13 |  |  | 0 |
| N. longicornis |  | 1 | 1 | 1 | 2 | 10 | 12 |  |  | 0 |
| N. longicornis |  | 2 | 3 | 4 |   |    | 10 |  |  | 1 |
| N. longicornis |  | 2 | 2 | 2 | 2 | 6  | 12 |  |  | 0 |
| N. longicornis |  | 1 | 1 | 3 | 5 | 6  | 10 |  |  | 0 |
| N. longicornis |  | 2 | 3 | 3 | 3 | 8  | 12 |  |  | 1 |
| N. longicornis |  | 1 | 1 | 2 | 3 | 6  | 12 |  |  | 0 |
| N. longicornis |  | 1 | 1 |   |   |    | 10 |  |  | 0 |
| N. longicornis |  | 1 | 1 |   |   |    | 10 |  |  | 0 |
| N. longicornis |  | 2 | 2 | 2 | 3 | 7  | 11 |  |  | 0 |

|                |    |   |   |   |   |    |    |    |    |    |
|----------------|----|---|---|---|---|----|----|----|----|----|
| N. longicornis |    | 1 | 1 | 2 | 2 | 5  | 10 |    |    | 0  |
| N. longicornis |    | 2 | 2 | 2 | 2 | 5  | 18 |    |    | 0  |
| N. longicornis |    | 1 | 2 | 3 | 3 | 8  | 12 |    |    | 1  |
| N. longicornis |    | 1 | 2 | 2 | 2 | 6  | 13 |    |    | 1  |
| N. longicornis |    | 1 | 1 | 2 | 2 | 5  | 13 |    |    | 0  |
| N. longicornis |    | 2 | 2 | 3 | 4 | 10 | 13 |    |    | 0  |
| N. longicornis |    | 1 | 1 | 1 | 2 | 7  | 14 |    |    | 0  |
| N. longicornis |    | 1 | 2 | 3 | 4 | 6  | 11 |    |    | 1  |
| N. longicornis | 6  | 1 | 2 | 2 | 2 |    | 10 | 9  | 10 | 1  |
| N. longicornis | 6  | 3 | 2 | 3 | 4 |    | 11 | 10 | 11 | -1 |
| N. longicornis | 7  | 1 | 2 | 3 | 3 |    | 8  | 10 | 10 | 1  |
| N. longicornis | 17 | 1 | 1 | 2 | 2 |    | 13 | 11 | 12 | 0  |
| N. longicornis | 16 | 1 | 1 | 2 | 3 |    | 10 | 10 | 11 | 0  |
| N. longicornis | 9  | 2 | 1 | 2 | 2 |    | 10 | 21 | 11 | -1 |
| N. longicornis | 9  | 1 | 2 | 2 | 2 |    | 11 | 12 | 12 | 1  |
| N. longicornis | 6  | 2 | 1 | 2 | 1 |    | 10 | 10 | 11 | -1 |
| N. longicornis |    |   | 1 | 2 | 3 |    |    | 10 | 10 |    |
| N. longicornis | 7  | 1 | 2 | 2 | 3 |    | 7  | 11 | 12 | 1  |
| N. longicornis |    |   |   |   |   |    |    |    |    |    |
| N. longicornis | 14 | 2 | 2 | 3 | 3 |    | 13 | 13 | 14 | 0  |
| N. longicornis | 4  | 1 | 2 | 3 | 2 |    | 11 | 12 | 12 | 1  |
| N. longicornis |    |   |   |   |   |    |    |    |    |    |
| N. longicornis | 8  | 2 | 3 | 4 | 3 |    | 13 | 13 | 13 | 1  |
| N. longicornis |    |   |   |   |   |    |    |    |    |    |
| N. longicornis | 12 | 2 | 2 | 3 | 4 |    | 14 | 13 | 15 | 0  |
| N. longicornis |    |   |   |   |   |    |    |    |    |    |
| N. longicornis | 52 | 4 | 2 | 4 | 5 |    | 16 | 14 | 15 | -2 |

|                |    |   |   |   |   |  |    |    |    |   |
|----------------|----|---|---|---|---|--|----|----|----|---|
| N. longicornis | 7  | 1 | 2 | 2 | 3 |  | 11 | 13 | 14 | 1 |
| N. longicornis |    |   |   |   |   |  |    |    |    |   |
| N. longicornis |    |   |   |   |   |  |    |    |    |   |
| N. longicornis | 7  | 1 | 1 | 2 | 4 |  | 12 | 11 | 11 | 0 |
| N. longicornis | 6  | 3 | 4 | 5 | 4 |  | 11 | 12 | 13 | 1 |
| N. longicornis | 11 | 2 | 2 | 3 | 3 |  | 11 | 10 | 12 | 0 |
| N. longicornis |    | 1 | 2 | 4 | 3 |  |    | 11 | 14 | 1 |
| N. longicornis | 7  | 1 | 1 | 1 | 1 |  | 9  | 9  | 10 | 0 |
| N. longicornis | 19 | 2 | 2 |   |   |  | 13 | 13 |    | 0 |
| N. longicornis |    |   |   |   |   |  |    |    |    |   |
| N. longicornis | 9  | 2 | 2 | 2 | 3 |  | 10 | 11 | 11 | 0 |
| N. longicornis |    |   |   |   |   |  |    |    |    |   |
| N. longicornis | 4  | 1 | 2 | 2 | 3 |  | 11 | 11 | 13 | 1 |
| N. longicornis | 5  | 1 | 2 | 2 | 2 |  | 10 | 13 | 13 | 1 |
| N. longicornis | 10 | 1 | 2 | 3 | 3 |  | 10 | 12 | 13 | 1 |
| N. longicornis | 6  | 2 | 2 | 2 |   |  | 14 | 12 |    | 0 |
| N. longicornis | 5  | 1 | 2 | 2 | 1 |  | 13 | 14 | 13 | 1 |
| N. longicornis | 11 | 2 | 2 | 2 | 3 |  | 12 | 12 | 14 | 0 |
| N. longicornis | 8  | 1 | 2 | 3 | 4 |  | 10 | 12 | 12 | 1 |
| N. longicornis | 6  | 1 | 2 |   |   |  | 13 | 11 |    | 1 |
| N. longicornis |    |   |   |   |   |  |    |    |    |   |
| N. longicornis | 5  | 1 | 2 | 2 | 3 |  | 9  | 12 | 11 | 1 |
| N. longicornis | 9  | 1 | 1 | 1 |   |  | 12 | 11 | 12 | 0 |
| N. longicornis | 6  | 1 | 2 | 2 | 2 |  | 12 | 11 | 11 | 1 |
| N. longicornis | 9  | 1 | 1 | 2 | 2 |  | 10 | 10 | 11 | 0 |
| N. longicornis | 4  | 1 | 2 | 2 | 2 |  | 8  | 11 | 12 | 1 |
| N. longicornis | 6  | 1 | 2 | 3 | 2 |  | 10 | 12 | 12 | 1 |

|                        |       |      |      |      |      |       |      |      |      |      |
|------------------------|-------|------|------|------|------|-------|------|------|------|------|
| N. longicornis         | 4     | 1    | 1    | 4    | 1    |       | 12   | 11   | 15   | 0    |
| N. longicornis         |       |      |      |      |      |       |      |      |      |      |
| N. longicornis         | 9     | 2    | 1    | 1    | 2    |       | 15   | 12   | 12   | -1   |
| N. longicornis         | 6     | 2    | 2    | 2    | 3    |       | 12   | 12   | 13   | 0    |
| N. longicornis         | 4     | 1    | 1    | 2    | 2    |       | 8    | 10   | 11   | 0    |
| N. longicornis         | 4     | 1    | 2    | 2    | 3    |       | 10   | 12   | 12   | 1    |
| N. longicornis         | 4     | 2    | 2    | 3    | 2    |       | 10   | 12   | 11   | 0    |
| N. longicornis         | 4     | 1    | 1    | 1    | 2    |       | 10   | 10   | 11   | 0    |
| N. longicornis         | 8     | 2    | 1    |      |      |       | 14   |      |      | -1   |
| N. longicornis         | 6     | 1    | 1    | 1    | 2    |       | 13   | 12   | 12   | 0    |
|                        |       |      |      |      |      |       |      |      |      |      |
|                        |       |      |      |      |      |       |      |      |      |      |
| Average N. vitripennis | 2.3   | 5.1  | 4.2  | 4.7  | 5.0  | 7.6   | 7.0  | 6.6  | 7.6  | -0.8 |
| STDEV                  | 2.43  | 1.29 | 1.14 | 1.25 | 1.32 | 2.08  | 1.66 | 1.14 | 1.23 | 1.20 |
| Variance               | 6.05  | 1.67 | 1.31 | 1.57 | 1.76 | 4.39  | 2.77 | 1.32 | 1.54 | 1.45 |
|                        |       |      |      |      |      |       |      |      |      |      |
| Average N. longicornis | 8.7   | 1.5  | 1.8  | 2.4  | 2.7  | 8.7   | 12.3 | 11.6 | 12.1 | 0.3  |
| StDev                  | 7.48  | 0.89 | 0.72 | 0.90 | 1.00 | 3.17  | 2.52 | 1.85 | 1.36 | 0.69 |
| Variance               | 57.25 | 0.80 | 0.52 | 0.82 | 1.00 | 10.19 | 6.38 | 3.51 | 1.89 | 0.48 |
